# Supplementary material for: Genome Sequence and Characterisation of Peribacillus sp. Strain AS_2, a Bacterial Endophyte Isolated from Alectra sessiliflora
Source: MDPI journal article supplement (doi:10.3390/microbiolres15010004), 2023-12-21
Supplement: s1 [file s1]

Table S1\_file

| Element        | CRISPR<br>ID/cas type | Start  | End    | Spacer<br>Gene | Repeat consensus/cas gene                            | Direction | Evidence<br>level |
|----------------|-----------------------|--------|--------|----------------|------------------------------------------------------|-----------|-------------------|
| CRISPR         | Contig_1_1            | 217705 | 217803 | 1              | GAAGGATCAGAAACTGACAAAGA<br>A                         | ND        | 1                 |
| CRISPR         | Contig_7_1            | 118657 | 118809 | 1              | CTTATACTGTTTTCTTAAAAGCCC<br>TCTCAAATAAAAATCAAGAACAGT | ND        | 1                 |
| Cas<br>cluster | cas                   | 16200  | 17699  | 2              | cas3_TypeI, cas3_TypeI                               | -         | -                 |
| CRISPR         | Contig_28_1           | 2042   | 2190   | 3              | AAAGCGTGAAACTCACGAGTAAA                              | ND        | 1                 |
| CRIPSR         | Contig_30_1           | 9330   | 9405   | 1              | TTGATTTATGTCTTATGTTATAGG                             | ND        | 1                 |

Table S2\_file

| Subject strain                                            | dDDH value | ANI value | G+C content difference (in %) |
|-----------------------------------------------------------|------------|-----------|-------------------------------|
| <i>Peribacillus frigoritolerans</i> DSM 8801 <sup>T</sup> | 86.5       | 97.0      | 0.1                           |
| <i>P. castrilensis</i> N3 <sup>T</sup>                    | 79.2       | 96.7      | 0.2                           |
| <i>P. simplex</i> NBRC 15720 <sup>T</sup>                 | 65.6       | 92.8      | 0.6                           |
| <i>P. butanolivorans</i> DSM 18926 <sup>T</sup>           | 33.6       | 84.1      | 2.5                           |
| <i>P. muralis</i> DSM 16288 <sup>T</sup>                  | 32.9       | 84.1      | 0.5                           |
| <i>P. loiseleuriae</i> FJAT-27997 <sup>T</sup>            | 13.7       | 71.5      | 2.9                           |
| <i>P. psychrosaccharolyticus</i> ATCC 23296 <sup>T</sup>  | 13.8       | 70.2      | 1.6                           |

Table S3\_file

| Function                               | Gene name                                                                                                                 | Gene Annotation                                                                                                                                                                                                                                                                                                                               |
|----------------------------------------|---------------------------------------------------------------------------------------------------------------------------|-----------------------------------------------------------------------------------------------------------------------------------------------------------------------------------------------------------------------------------------------------------------------------------------------------------------------------------------------|
| Transport                              | <i>LysE</i><br><i>MFS</i><br><i>ABC</i><br><i>NAD</i><br>-                                                                | LysE family transporter.<br>Major facilitator superfamily<br>Amino acid ABC transporter substrate binding ABC transporter<br>NAD(P)-dependent oxidoreductase<br>Branched-chain amino acid ABC transporter permease                                                                                                                            |
| Transcriptional regulator              | <i>AraC</i><br><i>AsnC</i><br><i>LysR</i><br><i>TetR/AcrR</i><br><i>IclR</i><br><i>MerR</i><br><i>DeoR</i><br><i>PadR</i> | AraC family transcriptional regulator<br>Lrp/AsnC family transcriptional regulator<br>LysR family transcriptional regulator<br>TetR/AcrR family transcriptional regulator<br>IclR family transcriptional regulator<br>MerR family transcriptional regulator<br>DeoR family transcriptional regulator<br>PadR family transcriptional regulator |
| Secretion and delivery system          | <i>EssA</i><br><i>EsaA</i><br><i>tatA</i><br>-<br>-<br>-<br>-                                                             | Type VII secretion protein<br>Type VII secretion protein<br>Protein secretion by the type II secretion system<br>MATE family efflux transporter<br>Multidrug resistance efflux transporter family protein<br>HlyD family efflux transporter periplasmic adaptor subunit<br>Efflux RND transporter permease subunit                            |
| Plant polymer degradation/modification | <i>TreC</i><br>-<br>-                                                                                                     | Alpha,alpha-phosphotrehalase<br>M48 family metalloproteinase<br>Alpha/beta hydrolase                                                                                                                                                                                                                                                          |
| Detoxification                         | -<br>-<br>-                                                                                                               | 2-dehydropantoate 2-reductase<br>Glutathione-dependent formaldehyde dehydrogenase<br>SDR family oxidoreductase                                                                                                                                                                                                                                |
| Redox potential maintenance            | -<br>-<br>-<br>-                                                                                                          | Aldehyde dehydrogenase family protein<br>Acryloyl-CoA reductase<br>L-lactate dehydrogenase<br>Carbonate dehydratase                                                                                                                                                                                                                           |
| Virulence and antibiotic factors       | <i>LiaF</i><br><i>BlaOXA</i><br>-<br>-                                                                                    | Cell wall-active antibiotics response protein LiaF<br>Class D beta-lactamase<br>Antibiotic biosynthesis monooxygenase<br>YihY/virulence factor BrkB family protein<br>Conserved virulence factor C family protein                                                                                                                             |
| Others                                 | <i>lysA</i><br>-<br>-                                                                                                     | Diaminopimelate decarboxylase<br>Hypothetical protein<br>2-isopropylmalate synthase                                                                                                                                                                                                                                                           |

Table S4\_file

| Biodegradation Function | Gene name                                                                            | Gene annotation                                                                                                                                                                                                                                   |
|-------------------------|--------------------------------------------------------------------------------------|---------------------------------------------------------------------------------------------------------------------------------------------------------------------------------------------------------------------------------------------------|
| nitroalkanes            | -                                                                                    | nitronate monooxygenase                                                                                                                                                                                                                           |
| Organosulfonate         | ssuD<br>TauD/TfdA                                                                    | alkanesulfonate monooxygenase<br>taurine dioxygenase                                                                                                                                                                                              |
| Heavy metals            | copZ<br>CopC/CopD family protein<br>arsC<br>cbiQ<br><br>mgtE<br>gudD<br>corA<br>nikA | copper ion binding<br>copper resistance<br>arsenate reductase<br>P-type cobalt transporter<br>heavy metal translocating P-type ATPase<br>magnesium transporter<br>magnesium ion binding<br>magnesium/cobalt transporter<br>nickel ABC transporter |
| Tryptophan              | kynA                                                                                 | tryptophan 2,3-dioxygenase                                                                                                                                                                                                                        |
| Aromatic compounds      | -<br>-                                                                               | glyoxalase/bleomycin resistance/dioxygenase<br>ring-cleaving dioxygenase                                                                                                                                                                          |
